# Supplementary material for: Stent thrombosis in early-generation drug-eluting stents versus newer-generation everolimus-eluting stent assorted by LVEF
Source: HighWire-hosted journal article supplement (doi:10.1136/heartjnl-2014-305743), 2014-08-27
Supplement: heartjnl-2014-305743supp.pdf [file heartjnl-2014-305743supp.pdf]

**Supplemental Table – Baseline and Procedural Characteristics of all Patients, Sorted by Stent Type**

| Variable                                 | Paclitaxel                | Sirolimus                 | Everolimus                | P       |
|------------------------------------------|---------------------------|---------------------------|---------------------------|---------|
|                                          | eluting stent<br>(n=1298) | eluting stent<br>(n=2599) | eluting stent<br>(n=1466) |         |
| <b>Age (years)</b>                       | 63.9±11.6                 | 62.7±11.5                 | 64.9±11.7                 | <0.0001 |
| <b>Male sex</b>                          | 990 (76.3)                | 1976 (76.0)               | 1118 (76.3)               | 0.98    |
| <b>BMI</b>                               | 27.0±4.1                  | 27.2±4.3                  | 27.2±4.4                  | 0.12    |
| <b>Hypertension</b>                      | 748 (57.6)                | 1422 (54.7)               | 857 (59.3)                | 0.01    |
| <b>Family history of CAD</b>             | 334 (26.5)                | 738 (28.4)                | 420 (29)                  | 0.30    |
| <b>Current smoking</b>                   | 671 (51.7)                | 1371 (52.8)               | 736 (50.9)                | 0.51    |
| <b>Dyslipidemia</b>                      | 683 (52.6)                | 1403 (54.0)               | 794 (54.9)                | 0.48    |
| <b>Diabetes Mellitus</b>                 | 210 (16.2)                | 471 (18.1)                | 246 (17.0)                | 0.30    |
| <b>Renal failure (GFR&lt;60mL/min)</b>   | 138 (14.2)                | 294 (15.6)                | 146 (11.6)                | 0.005   |
| <b>Acute coronary syndrome</b>           | 714 (55.1)                | 1385 (53.3)               | 855 (58.3)                | 0.009   |
| Unstable angina                          | 67 (9.4)                  | 129 (9.3)                 | 108 (12.6)                |         |
| Non-ST-segment-elevation MI              | 292 (40.9)                | 622 (44.9)                | 382 (44.7)                |         |
| ST-segment-elevation MI                  | 355 (49.7)                | 634 (45.8)                | 365 (42.7)                |         |
| <b>Cardiogenic shock</b>                 | 9 (0.7)                   | 28 (1.1)                  | 33 (2.3)                  | 0.001   |
| <b>LVEF</b>                              | 55.3±11.5                 | 54.3±11.9                 | 51.5±12.7                 | <0.0001 |
| Moderate-severely impaired LVEF          | 194 (14.9)                | 449 (17.3)                | 370 (25.2)                | <0.0001 |
| Mildly impaired LVEF                     | 300 (23.0)                | 584 (22.4)                | 360 (24.6)                |         |
| Normal LVEF                              | 804 (61.9)                | 1566 (60.3)               | 736 (50.2)                |         |
| <b>Multivessel treatment</b>             | 218 (16.8)                | 407 (15.7)                | 342 (23.3)                | <0.0001 |
| <b>Lesions treated per patient</b>       | 1.5±0.7                   | 1.5±0.7                   | 1.8±1.0                   | <0.0001 |
| <b>Culprit left main coronary artery</b> | 30 (2.3)                  | 46 (1.8)                  | 67 (4.6)                  | <0.0001 |
| <b>Arterial bypass graft</b>             | 5 (0.4)                   | 5 (0.2)                   | 3 (0.2)                   | 0.49    |
| <b>Saphenous vein graft</b>              | 33 (2.5)                  | 77 (3.0)                  | 47 (3.2)                  | 0.58    |
| <b>Multistent treatment</b>              | 614 (47.3)                | 1215 (46.7)               | 844 (57.6)                | <0.0001 |
| <b>Average stent diameter</b>            | 2.9±0.4                   | 2.9±0.6                   | 2.9±0.4                   | 0.21    |
| <b>Total stent length per patient</b>    | 29.1±16.9                 | 31.9±18.3                 | 32.8±18.9                 | <0.0001 |
| <b>Glycoprotein IIb/IIIa antagonist</b>  | 245 (18.9)                | 501 (19.3)                | 438 (29.9)                | <0.0001 |
| <b>Aspirin at discharge</b>              | 1282 (98.8)               | 2549 (98.1)               | 1433 (97.7)               | 0.13    |
| <b>Clopidogrel at discharge</b>          | 1290 (99.4)               | 2566 (98.7)               | 1432 (97.7)               | 0.001   |
| <b>Oral anticoagulation at discharge</b> | 15 (1.2)                  | 51 (2.0)                  | 27 (1.8)                  | 0.17    |

Categorical variables are expressed as count (percentage). Valid percentages may vary for some counts, because of missing values. Continuous variables are expressed as mean ±SD when appropriate. BMI indicates body mass index; CAD, coronary artery disease; GFR, glomerular filtration rate; LVEF, left ventricular ejection fraction; MI, myocardial infarction.
